1       **The fingering patterns in the epithelial layer control the gap closure rate**  
2                                       **via curvature-mediated force**

3                       Hyuntae Jeong<sup>1</sup>, Jinwook Yeo<sup>1</sup>, Seunghwa Ryu<sup>1,\*</sup>, Jennifer Hyunjong Shin<sup>1,\*</sup>

4  
5       <sup>1</sup>Department of Mechanical Engineering, Korea Advanced Institute of Science and Technology,  
6                                       Daejeon, Republic of Korea

7                                       **\*Corresponding author**

8       **Abstract**

9       Closing gaps in cellular monolayers is a fundamental aspect of both morphogenesis and wound  
10       healing. This closure can be achieved through leader cell crawling or actomyosin-based  
11       contraction, depending on the size of the gap. Here, we focus on wounds whose closure is driven  
12       by interfacial instabilities, featuring both leader cell-driven fingers and actin-mediated contraction.  
13       Our proposed model predicts a positive correlation between the frequency of fingering and the  
14       overall speed of boundary closure. This fingering frequency is precisely regulated through the  
15       orchestration of cell density-driven pressure, cell-cell repulsions, and the initial curvature of the  
16       wound boundary. Our findings demonstrate an inverse correlation between fingering frequency  
17       and boundary curvatures, indicating a "self-control" mechanism for closure rates independent of  
18       the initial curvatures of the wound periphery. Notably, changes in curvature caused by fingering  
19       formation generate force that aids in the healing process.

20

21

22

## 23 **Introduction**

24 Gap closure is a ubiquitous physiological phenomenon that occurs in response to external injuries  
25 or internal apoptotic events during morphogenesis and tissue homeostasis<sup>1-5</sup>. Proper re-  
26 epithelization is critical to close wounds, involving two modes of cellular migration: purse-string  
27 contraction of the wound edge and crawling of the boundary cells<sup>6,7</sup>. Purse-string contraction  
28 involves actomyosin cable contraction that spans over multiple cells along the boundary, whereas  
29 leader cell crawling is achieved through the active emergence of lamellipodia<sup>4,8-12</sup>. Previous studies  
30 have demonstrated the complementary actions of these two modes during wound closure<sup>10,13-17</sup>.  
31 Smaller wounds or voids created by defects in the extracellular matrix (ECM) are closed  
32 predominantly by purse-string-like contractions<sup>15,16</sup>. Wounds are considered small when 10~20  
33 cells are aligned along the perimeter without any discontinuity in actomyosin cables. Larger  
34 wounds, on the other hand, are closed through the active crawling of leader cells at the  
35 boundary<sup>10,14</sup>.

36 Two distinct closing modes can, however, occur simultaneously in a cooperative manner to  
37 expedite the closure<sup>18-21</sup>. The synergistic effects from the coexisting two modes have been  
38 demonstrated both experimentally and computationally for small wounds<sup>22-24</sup>. *Ravasio et al.*  
39 demonstrated the contribution of crawling forces during purse-string contractions in the small  
40 wound by verifying a mathematical superposition of purse-string and crawling<sup>22</sup>. Furthermore, the  
41 *in silico* model by Staddon et al. confirmed the increase in closure speed when two modes  
42 contributed mutually, whose relative dominance depended on the size of local curvatures<sup>23</sup>. Both  
43 studies suggested the cooperative effects of two modes for small wounds of high enough  
44 curvatures ( $0.1\sim 0.6\mu\text{m}^{-1}$ ) spanning over a short perimeter of 10~20 cells. On the other hand, larger

45 wounds involve complex features like abrupt crawling protrusions of finger-like shape at the  
46 regions of discontinued actomyosin cables<sup>25-27</sup>. As the convex fingers extrude further, concave  
47 suspending-bridge-like actomyosin cables appear between the fingers, which resemble negative  
48 curvature bridges on small wound boundaries and are expected to contribute to overall wound  
49 closure through purse-string mechanisms as the concave strains developed<sup>10,14,28-30</sup>. Although the  
50 development of purse-string contractions following the outgrowth of fingers would be an  
51 important process for the closing of large wounds, the descriptions for fingering extrusions and  
52 contraction of bridges mostly remain in stochastic models<sup>28,31,32</sup>. However, *Vishwakarma M. et al.*  
53 recently discovered that the adjacent fingers were equally space along the boundary, whose length  
54 scale was similar to the correlation length of cellular forces within the monolayer<sup>33</sup>. These findings  
55 led us to postulate that the fingering extrusion must be governed by the physical forces of  
56 constituent cells in the layer as being a well-regulated phenomenon to close the gap. Here, we aim  
57 to elucidate this intriguing event based on a mathematical model and quantification tools for  
58 cellular dynamics.

59 In this study, we focus on the closing event of reasonably large wounds, typically of 100s-1000s  
60  $\mu\text{m}$  in radius, where both modes of closure are important. To elucidate the closing mechanism, we  
61 first identify the role of fingers in wound closures based on a simple mathematical isotropic line-  
62 tension model that reflects forces along the fingering patterns. Comparing the mathematical model  
63 and experimental results clarifies that fingering extrusion controls overall wound closure and is  
64 orchestrated by density gradient-driven cell flux and the initial boundary curvatures of the wound  
65 boundary.

66

## 67 **Results**

### 68 **Initial diameter-dependent fingering protrusion dictates dynamic changes in wound** 69 **boundary.**

70 In this study, the wounds are created by culturing the MDCK (Madin-Darby Canine Kidney cells)  
71 monolayer with a PDMS stencil for 18 hrs and carefully removing the stencils to obtain a smooth  
72 wound edge of the desired shape and size (Fig. 1(a)). We use circular wounds of various initial  
73 radii ( $R_{initial}$ ) ranging from 150 $\mu\text{m}$  to 500 $\mu\text{m}$  and a straight one to investigate the effect of the initial  
74 wound curvature ( $\kappa_{initial} = 1/R_{initial}$ ) to confirm the previously reported correlation between the  
75 initial curvature and the wound closing modes<sup>22</sup>. Consistently with existing reports, the small  
76 wound ( $R_{initial} = 150\mu\text{m}$ ) shows a shrinking with a smooth boundary, predominantly via purse-  
77 string-like contraction. In contrast, the wound of larger radii ( $R_{initial} = 250, 500\mu\text{m}, \infty$ ) shows a  
78 rough interface due to the actively protruding cells at the onset of the closure (Fig. 1(b)). As a  
79 reference, a 150 $\mu\text{m}$  radius (942 $\mu\text{m}$  in perimeter) corresponds to roughly  $\sim 30$  cells, and a 500 $\mu\text{m}$   
80 radius (3142 $\mu\text{m}$  in perimeter) includes  $\sim 100$  cells. As shown in the boundary trajectories of a large  
81 wound ( $R_{initial} = 500\mu\text{m}$ ), the initially smooth boundary begins to exhibit periodic waves formed  
82 by the emergence of extruding fingers (Fig. 1(c)). As the fingers extruded further, a local concave  
83 bridge between two adjacent fingers is naturally developed, and this local concave region is termed  
84 "valley" henceforth. The difference in the advancing speeds of the closing boundary between the  
85 fast-moving fingers and the slow-moving valleys causes an increase in negative curvature of the  
86 valley (Fig. 1(d)). Soon after, valley regions begin to accelerate, possibly to avoid the excess  
87 negative curvatures, gradually smoothening the boundary trajectories as shown clearly in Fig. 1(d)  
88 from a dashed blue ( $t=7\text{hr}$ ) line to a dotted green ( $t=8\text{hr}$ ) line. Here, we define the roughness index

89 ( $RI$ ) of the wound boundary as the ratio between the contour perimeter and the convex hull  
90 perimeter (Fig. 1(e)). For the smallest wound closure ( $R=75\mu\text{m}$ ), the  $RI$  persistently decreases  
91 throughout the closure, indicating a smooth shrinking over time without any finger formation. For  
92 larger wounds of  $R_{initial} >150\mu\text{m}$ , however, the  $RI$  curves exhibit positive slopes during earlier  
93 times (0~6 hrs), reflecting the initial formation of fingers. Once the  $RI$  reaches its peak value, it  
94 slowly decays over time, which suggests the temporal maintenance of fingers and valleys (Fig.  
95 1(e)). The maximum  $RI$  value and the duration over which higher  $RI$  value is maintained positively  
96 correlate with the  $R_{initial}$ , which reflects the more prominent effect of the fingers on the closure of  
97 larger wounds. To investigate the basis for the  $R_{initial}$ -dependent  $RI$  profile, we further quantify two  
98 major characteristics of the fingers, namely the finger amplitudes and the finger-to-finger distance  
99 ( $FFD$ ). The amplitude is defined as the length of fingers from the inscribed circle of boundaries  
100 after 6 hrs from the protrusion. The  $FFD$  is the distance between the adjacent fingers. As shown  
101 in Fig. S1, the finger amplitude shows insignificant dependence on the  $R_{initial}$ , whereas the  $FFD$   
102 exhibits a notable negative correlation with the  $R_{initial}$  (Fig. 1(f)), suggesting that the occurrence of  
103 the fingers predominantly influences the  $RI$  profile than their amplitudes. When the  $FFD$  is plotted  
104 as a function of time for  $R_{initial} = 500\mu\text{m}$ , the formations and falls of the  $FFD$ , reflecting the genesis  
105 and merger of the fingers, clearly show slow decays similar with the maintenance of  $RI$  in larger  
106 wounds, where the red dotted line represents the mean value of 17 samples (Fig. 1(g)). On the  
107 other hand, the  $FFD$  changes for  $R_{initial} = 150\mu\text{m}$  showed drastic decrease corresponding to the  $RI$   
108 changes in small wounds, where the red dotted line represents the man value of 8 samples (Fig.  
109 1(g)). The corresponding decaying of  $FFD$  values in the plot supports the changes of  $RI$  reflects  
110 the fingering dynamics along the boundary.

111 Based on these observations, we propose that wound closure in the epithelial cell layer occurs in  
112 three distinct regimes (Fig. 1(h)). During regime (i), the extrusion of fingers gradually increases  
113 the boundary roughness. Once wave-like sequential finger and valley structures develop, the rough  
114 boundary is maintained during regime (ii), as the valley regions follow the extruding fingertips. In  
115 the shrinking regime (iii), fingers disappear, and wound closure is accomplished by contraction of  
116 the smooth boundary. Especially, the initial boundary radius ( $R_{initial}$ ) and fingering characteristics,  
117 such as finger frequency ( $FFD$ ) and finger amplitudes, dictate the closing process of wounds via  
118 controlling the span of each regime in the closure (Fig. 1(i)). Thus, the following sections of this  
119 paper extensively explore the roles of these variables on wound closure, with fingering extrusion  
120 serving as a key parameter for controlling the closing performance.

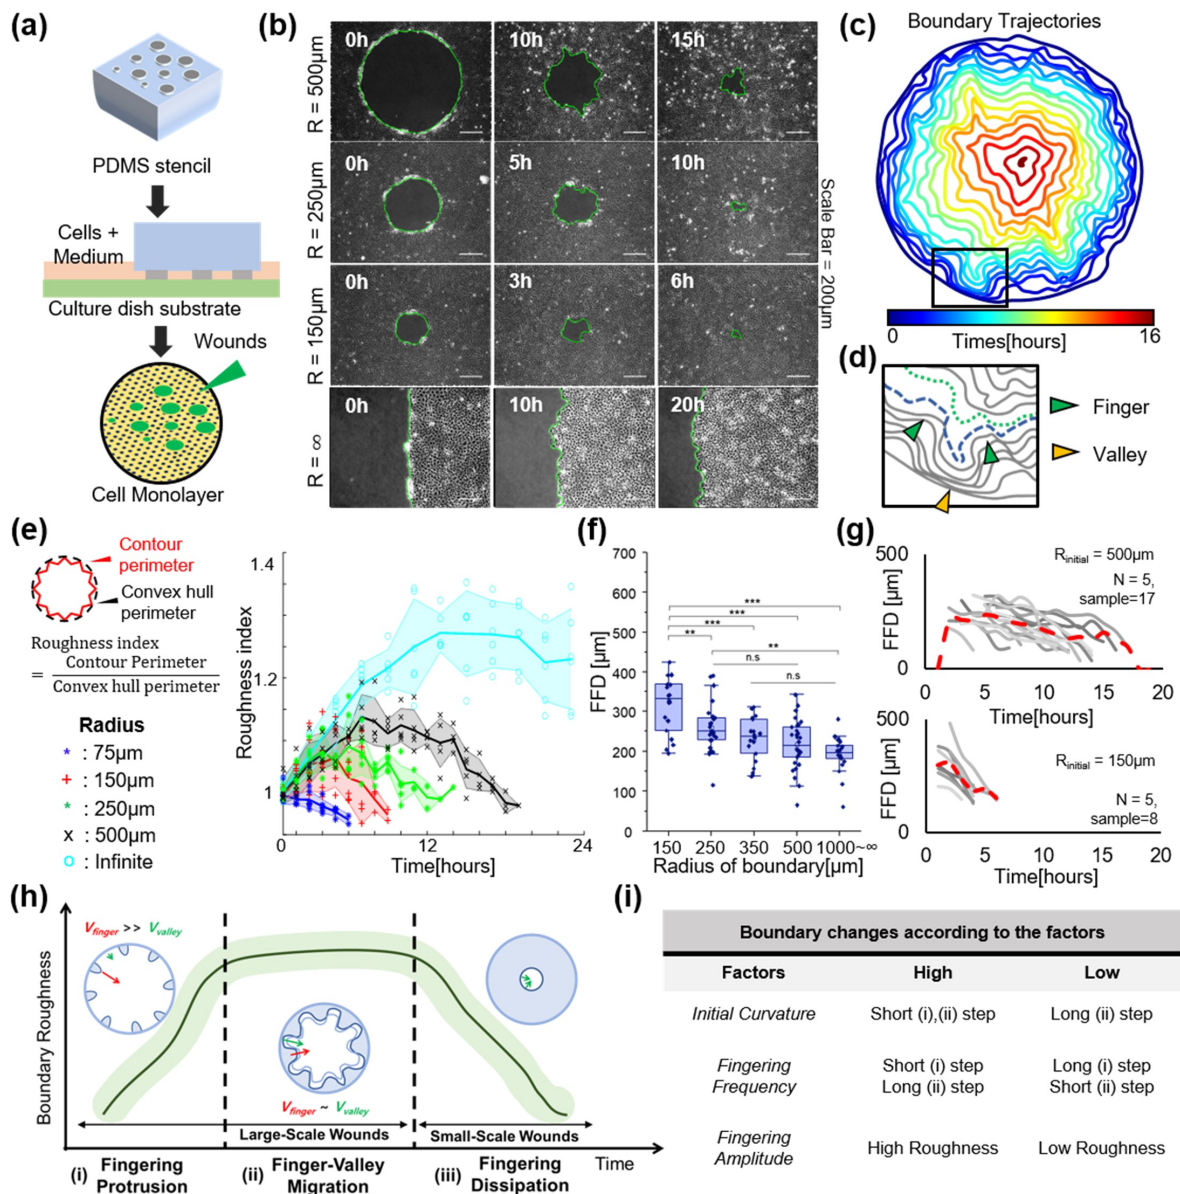

121  
 122 **Fig. 1 Fingering extrusions along the wound boundary with various curvatures formed by PDMS stencils.** (a)  
 123 Steps for creating various wound shapes by fabricating PDMS stencil from the silicon wafer. (b) Boundary shape  
 124 changes during the wound closure according to initial diameters, smooth surface shrinking when the wound is  
 125 comparatively small(radius = 150µm) and complicated change of wound boundary according to the fingering  
 126 extrusion in the large wound(radius = 500µm, straight wound), (c) The trajectory of the boundary curves over time  
 127 when the radius is 500µm, (d) Enlarged images of boundary trajectory when cells formed the fingering structures,  
 128 green triangles indicate fingering regions and yellow triangles indicate valley regions, (e) Schematic for calculating  
 129 the roughness of wound boundary and comparison of roughness of wound boundary with different radii (blue: 75µm,  
 130 red: 150µm, green: 250 µm, black: 500µm, cyan: infinite), (f) Distance between fingers according to the initial  
 131 diameters of the wounds (\* :  $p \leq 0.05$ , \*\* :  $p \leq 0.01$ , \*\*\*:  $p \leq 0.001$ ), (g) Temporal change of distance between  
 132 fingers during the wound closure (when the radius of wounds is 500µm). (h) Schematics for change of boundary  
 133 shapes with three sequential steps due to the fingering extrusion, (i) Table for the changes of boundary shape according  
 134 to the geometrical factors.



135 **A mathematical model for finger structures predicts the positive correlation between**  
136 **boundary speeds and fingering frequency.**

137 We first predict the role of finger-valley structures by simplifying the force along the boundary  
138 as an isotropic line tension (Fig. 2(a, b)), which counter-balances the protruding crawling force at  
139 the fingers. At the steady state where the boundary roughness is maintained at a constant level  
140 (regime (ii) of Fig. 1(h)), the force equilibrium is assumed between the crawling force at the fingers  
141 ( $F$ ) and the line tension ( $T$ ) at the boundary as follows,

$$142 \quad F - 2T \cdot \cos\theta = 0 \quad (1)$$

143 where  $\theta$  is the angle between the vertical axis of fingertips and the tangent line of the finger  
144 boundary (Fig. 2(a)). By simplifying the valleys to spatially repetitive circular arcs, the force  
145 equilibrium of the valley region (curvature =  $1/r_v^\infty$ ) with a line tension and constant velocity ( $v$ )  
146 of the boundary can be expressed as,

$$147 \quad \frac{T}{r_v^\infty} = \mu \cdot v \quad (2)$$

148 where the  $\mu$  is a viscous friction coefficient, inclusive of resistance caused by both cell-cell and  
149 cell-substrate adhesions (Fig. 2(b)). To validate these relationships for given  $T$  and  $\mu$ , we measure  
150 the velocity and boundary curvature ( $1/r_v^\infty$ ) of the valley from the experimental data, confirming  
151 the linear correlation between these two quantities (Eq. 2) as shown in Fig. 2(c). Here, the  
152 instantaneous boundary velocity ( $v$ ) is measured by tracking the vertical displacement at a 1-hr  
153 interval, and the temporal changes in curvature are displayed by the color gradation in the plot.  
154 Interestingly, the finger velocities, marked by the purple-pink scale, are clustered around  $30\mu\text{m/h}$   
155 with no apparent dependency on the boundary curvature ( $1/r_v^\infty$ ) (Fig. 2(c)). These experimental



156 data are well reflected on the spatiotemporal graph for the representative fingering extrusion that  
157 shows an almost constant slope as a function of time (Fig. 2(d)). In contrast, the valley region  
158 exhibits a distinct slope change at around 10hrs (Fig. 2(e)).

159 In the case of the overall wound closure, one can expect the repetitive extrusions of fingers to  
160 influence the overall closing speeds. From the relationship between the radius of curvature and the  
161 finger-to-finger distance ( $FFD$ ), i.e.,  $2r_v^\infty \cos\theta = FFD$ , shown in Fig. 2(f), the boundary migration  
162 of straight wounds ( $R_{initial} = \infty$ ) can be expressed as the relationship between  $F$ ,  $FFD$ , and the  
163 overall wound closure speeds  $v_{oc}$  as follows (Fig. 2(f)).

$$164 \quad \frac{F}{FFD} = \mu \cdot v_{oc} \quad (3)$$

165 Here, Eq 3 lies on the assumption that tensional force  $T$  and friction coefficient  $\mu$  are isotropic  
166 and constant with respect to local radius change, inferring the linear relationship between the  $v_{oc}$   
167 to the fingering frequency ( $\sim 1/FFD$ ) in the straight wound geometry. To experimentally test the  
168 effect of initial fingering emergence on the overall wound closing rate, the average velocity values  
169 of the boundary measured over 20 hrs are plotted against  $1/FFD$  of the corresponding samples at  
170 the moment where fingers begin to emerge ( $t = 6$  hrs) as shown in Fig. 2 (g, h). The results confirm  
171 a clear positive correlation between the overall closing rate of the wound and the initial fingering  
172 frequency. Furthermore, given that cell density acts as a driving factor for bulk motion within cell  
173 monolayer, we investigate the effect of initial cell density ( $\rho_0$ ) on the overall closing rate as shown  
174 in Fig. 2(i). Interestingly, the correlation strength between  $v_{oc}$  and  $\rho_0$  is notably weaker than that  
175 between  $v_{oc}$  and  $1/FFD$ , marked by the  $R^2$  value. On the other hand,  $\rho_0$  shows the strongest  
176 correlation ( $R^2=0.8916$ ) to the early fingering emergence ( $1/FFD$ ) (Fig. 2(j)). The result implies

177 that the  $\rho_0$  must act as an upstream cue that contributes to the emergence of the initial fingers,  
178 whose numbers eventually impact the overall  $v_{oc}$  as schematically illustrated in Fig. 2(k).

179 Thus far, we have clarified the direct role of fingers on the wound closure rate and identified the  
180 factors that regulate fingering frequency. Higher density is a primary candidate that increases the  
181 initial frequency of fingers (Fig. 2(j)), while the higher curvature of the boundary resists the  
182 emergence of fingers (Fig. 1(f)). Therefore, the following section will extensively analyze the role  
183 of these factors in the regulation of fingering frequency.

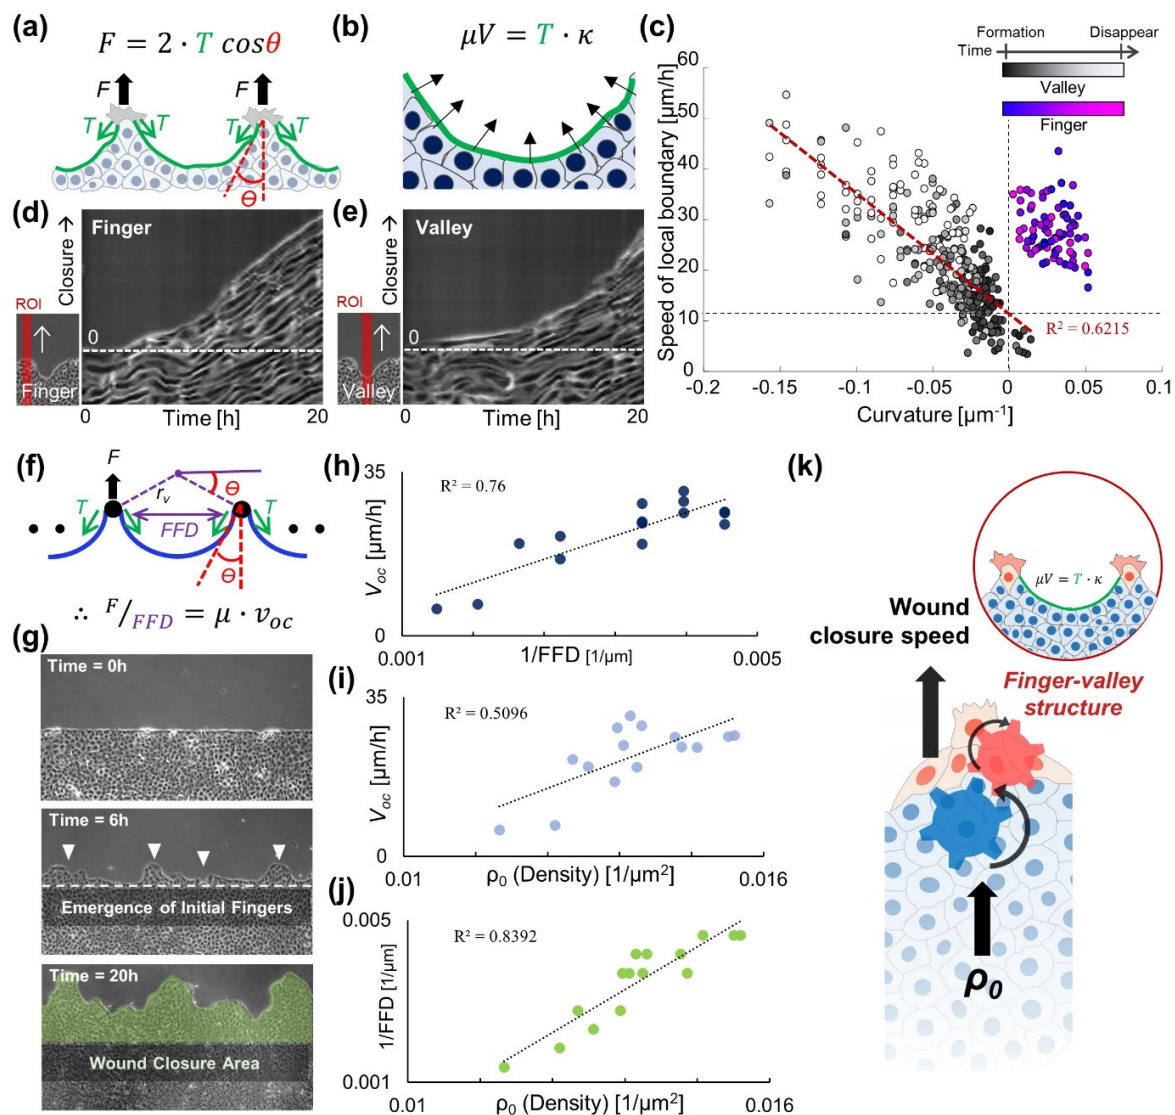

184

185 **Fig. 2 Effects of finger-valley structures on wound closure speeds based on the line tension model.** (a, b)  
 186 Schematics of force equilibrium at the finger-valley structures, (c) Distribution of proceeding speeds of wound edges  
 187 according to the curvatures, the curvature was measured from the three points in the edge of valleys and fingers. The  
 188 gray gradient and the color gradient indicate a relative time for diminishing of valleys and fingers, respectively. (d, e)  
 189 Kymographs for proceeding of the finger and valley region of the straight-patterned wounds, (f) Schematics for the  
 190 role of the fingering frequency on overall wound closure speeds, (g) Measurement of  $\rho_0$ , FFD (at 6 hrs), and  $V_{oc}$   
 191 (during 20hrs) for analyzing the correlation between variables, (h) Comparison of overall wound closure rate and  
 192 the initial fingering frequency, (i) Comparison of overall wound closure rate and initial cell density in the monolayer  
 193 (measured by counting the number of cells in windows), (j) Plot for a linear relationship between the initial density of  
 194 cells and fingering frequency after 6 hrs, (k) Schematic for relationships amongst density-based flux, fingering  
 195 extrusions, and the wound closure speed.

196

197 **Dynamic changes in cellular density induce cell fluxes for the fingering extrusions at the**  
198 **wound boundary.**

199 The cellular density ( $\rho$ ), the first candidate known as a regulator for finger generation, is not  
200 homogeneous within the monolayer, both spatially and temporally (Fig. 3(a)). The spatial  
201 differences in densities create a local density gradient ( $\nabla\rho$ ) within the monolayer that can perturb  
202 the velocity fields of cells due to the particle characteristics of diffusive migration. As shown in  
203 the series of cellular area ( $1/\rho$ ) map in Fig. 3(b), the compressed cells in the high-density region  
204 develop the diverging velocity field towards the neighbors while their sizes relax to enlarge (Fig.  
205 3(b)). The temporal plots for divergence and cellular area exhibit similar profiles, yet with a phase  
206 shift by  $\sim 2$ hrs, suggesting a possible role of the cellular density in developing the velocity  
207 divergence within the monolayer (Fig. 3(c)). To quantify the similarity between the two plots, we  
208 analyze the cross-correlation of divergence and unbiased cellular area calculated by subtracting  
209 the background decreasing trend caused by the increase in cell density. As shown in Fig. 3(d, e),  
210 the divergence and cellular area ( $1/\rho$ ) demonstrate a fairly high correlation ( $r_{average} = 0.55$ ) with  
211 approximately 2 hrs time delay ( $lag_{average} = 1$ h 45min). The cellular fluxes generated from the  
212 diverging source is transmitted to the boundary through intimate cell-cell junctions within the  
213 monolayer. This transmitted flux then can induce a thrusting pressure to form fingering extrusions  
214 at the boundary. To confirm this assumption, the spatiotemporal velocity changes in an ROI near  
215 the fingering extruding boundary in Fig. 3(f) are analyzed (Fig. 3(g-h)). The kymograph of velocity  
216 divergences exhibits several diagonal lines from the posterior region to the boundary, attributing  
217 to the spatiotemporal propagations of cell fluxes toward the boundary. Notably, the divergence  
218 source (red) is sequentially displaced toward the boundary until the emergence of the fingering

219 extrusion (marked by red arrowheads). Consistently, diagonal lines in the kymograph of unbiased  
220 velocity obtained by removing mean velocities account for the propagation of fluxes from the inner  
221 monolayer leading to the formation of the fingers (Fig. 3(h)). Based on these quantified results, we  
222 confirm that the propagation of heterogeneous density-driven cell flux is the key mechanism for  
223 initiation of new finger extrusion at the boundary.

224 It is interesting to note that sporadically dividing cells naturally promote heterogeneity in densities,  
225 generating pressure against neighboring cells as the daughter cells expand (Fig. 3(i)). Given the  
226 highly proliferating nature of MDCK cells, it can be assumed that cell divisions sufficiently  
227 provoke divergences of velocity vectors, eventually leading to fingering extrusions. To test this  
228 hypothesis, we quantified the changes in cellular area ( $1/\rho$ ) near the boundary while attenuating  
229 cell division through thymidine treatments. Thymidine arrests the cell cycle at the G1/S phase,  
230 thereby inhibiting cell division. As shown in Fig. 3(j-l), the mean cellular area shows periodic  
231 fluctuations in the untreated control conditions, whereas the mean cellular area continues to  
232 increase without fluctuations when cell division is inhibited by thymidine (Fig. S2). The  
233 emergence and propagation of velocity divergence (Fig. 3(g)) that act as cues for additional  
234 fingering extrusions also arise from dynamic fluctuations during the cell dividing process (Fig. S3,  
235 Mov. S1), resulting in an increase in the number of fingers only when cells are actively dividing  
236 (Fig. 3(m)). Inhibition of cell division naturally leads to the suppression of fingering formation in  
237 later time ( $>10$ hrs) (Fig. 3(m)). Conclusively, we have identified a critical role of cell division in  
238 the emergence of fingers by initiating divergences in the velocity vector field, acting as a local  
239 perturbation in density and velocity. Furthermore, in addition to the density-driven pressures, the  
240 initial polarity of traction forces also exhibits correlated results for the fingering positions. As  
241 shown in Fig. S4(a, b), the pre-polarized traction vectors to the normal direction to the boundary



242 interface, which coincide with the crawling force of boundary cells, are shown to be localized at  
 243 the immediate posterior region of the future fingers. This result suggests that the polarity of  
 244 tractions near the boundary can determine where the crawling forces would accumulate to initiate  
 245 the formation of fingers.

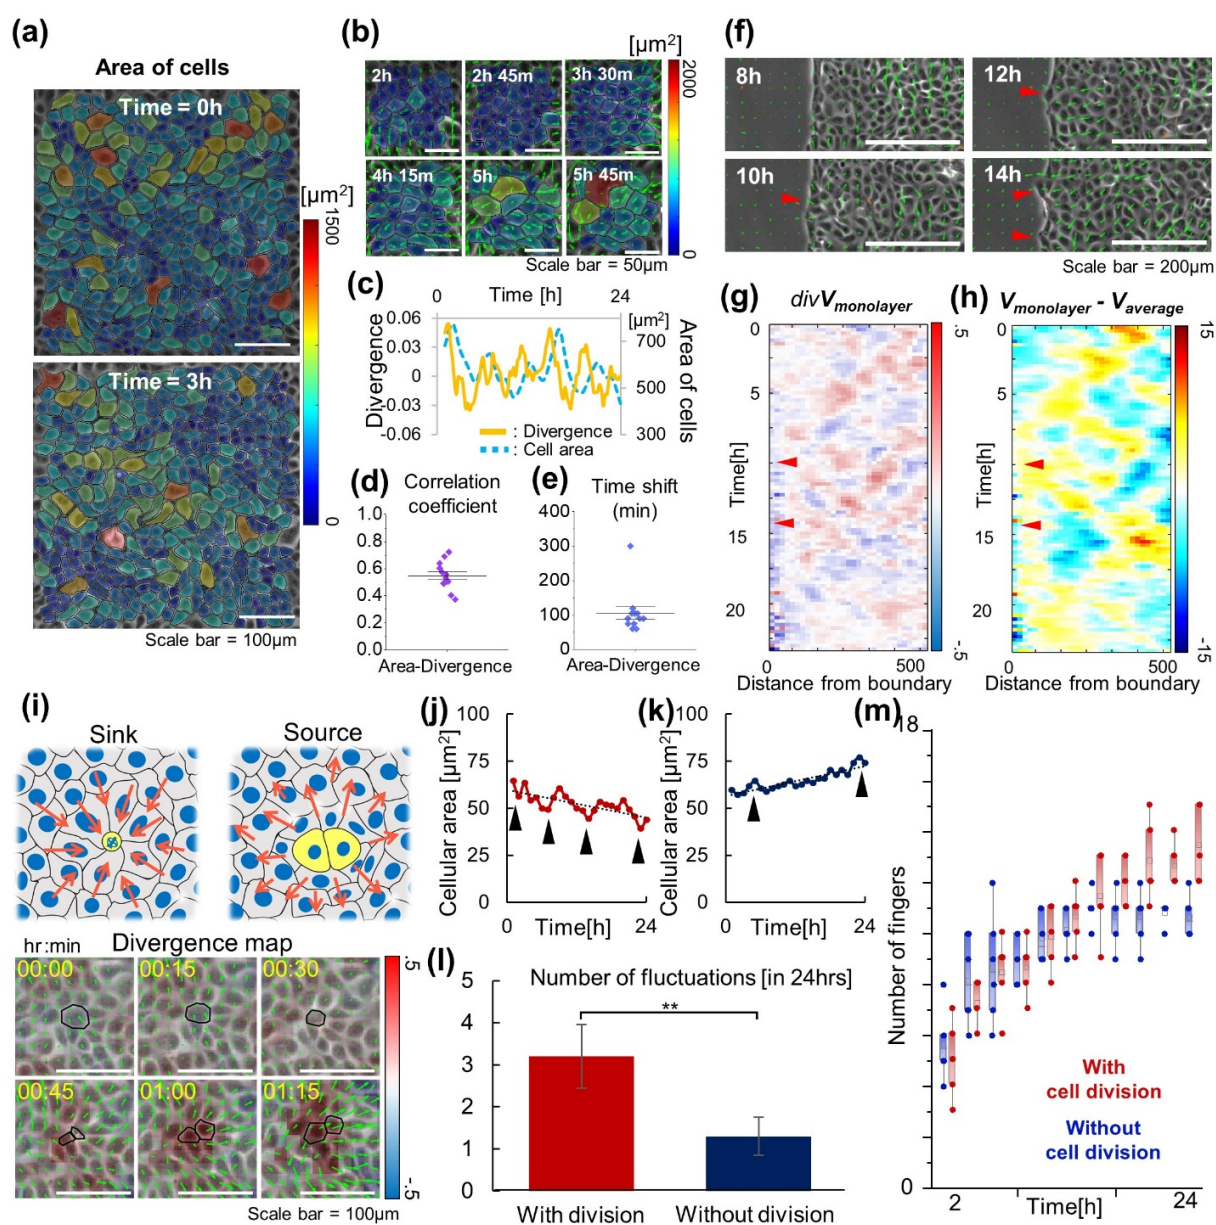

246

247 **Fig. 3 Dynamics of the cell populations in monolayer induced the fingering extrusions at the boundary**  
248 (a) Heterogeneously distributed cell density in the spatiotemporal domain, (b) Visualized results for the  
249 relationships between cellular density and cell fluxes (Green arrows = velocity vectors, Color map = Area  
250 of cells), (c) Comparison of changes in divergences and cellular area at the same domain during the wound  
251 closure, (d, e) Box plots for the correlation coefficient and time shift between divergence and cellular area  
252 plots, (f) Images of fingering extrusions in the region of interests, the red arrow heads indicate the location  
253 of fingering formations, (g, h) The kymograph of the divergence and unbiased velocity. The red arrows  
254 shows the time points when fingers are extruded. (i) Schematic for effects of proliferation for deriving  
255 disturbances of vector fields in the cell monolayer and divergence map with velocity vectors near the cell  
256 dividing region; the black line indicates the dividing cells. (j, k) Cellular area changes near the boundary  
257 ( $200 \times 200 \mu\text{m}^2$  from the edge), when the cells were dividing or not (Black arrow: each fluctuation). (l)  
258 Number of fluctuations when the cell division is controlled (\* :  $p \leq 0.05$ , \*\* :  $p \leq 0.01$ , \*\*\*:  $p \leq 0.001$ ), (m)  
259 Changes in the number of fingers during the wound healing according to the cell proliferation conditions.

260

261 **Converging flux from the initially curved boundary does not increase the wound closure rate.**

262 Contrary to the straight wound boundary in previous sections, naturally formed wounds are likely  
263 to feature inherent initial curvatures ( $\kappa_{initial}$ ) that affect various aspects of wound closures tabulated  
264 in Fig. 1(i). As shown in Fig. 4(a), a negative  $\kappa_{initial}$  at the boundary causes the converging flux of  
265 cells from the dense reservoir toward the center of the wound. In this scenario, the degree of  
266 convergence would increase with  $\kappa_{initial}$ , which is predicted to result in a faster closure of the  
267 wounds ( $\Delta A = \text{constant}$ ,  $v_{oc} \propto \kappa_{initial}$ ) with a higher fingering frequency. To test this prediction,  
268 we analyze the overall closure rate ( $v_{oc}$ ) and  $\Delta A$  as the parameters to assess the wound closure (Fig.  
269 4(b)). The experimental data, however, show the positive linear relationship between  $\Delta A$  and  $R_{initial}$   
270 ( $1/\kappa_{initial}$ ), contradicting our prediction (Fig. 4(c)). Consequently, the overall closure rate  
271 ( $\Delta A/2\pi R_{initial}$ ) shows an almost independent relationship with  $\kappa_{initial}$  (Fig. 4(d)). In addition, the  
272 previously obtained relationship between  $FFD$  and  $R_{initial}$  (Fig. 1(f)) exhibits the opposite result to  
273 prediction. The number of cells between neighboring fingers, another parameter for the inverse of  
274 fingering frequency, also displays larger values as  $\kappa_{initial}$  increases (Fig. S5). Since the fingering  
275 frequency has been found to linearly correlates with the wound closure speeds (Fig. 2 (f)), the



276  $\kappa_{initial}$ -independent  $v_{oc}$  can be understood as a consequence of the counteractions between  
277 converging effects and downregulation of fingering extrusions at higher  $\kappa_{initial}$  wound boundaries.

278

279 **The regulation of fingering extrusions induces the wound closures independent of the initial**  
280 **curvature.**

281 The previously verified linear correlation between the fingering frequency and the wound closure  
282 rate is based on the assumption that the initial curvature of the wound is infinity (i.e. straight  
283 wounds). Therefore, in order to generalize the relationship between the fingering frequency and  
284 the wound closure speeds, consideration of additional effect from the initial curvature values is  
285 necessary. As shown in Fig. 4(e), the constituent components of boundary shapes such as  $R_{initial}$ ,  
286 fingering amplitude ( $h$ ), and fingering frequency ( $n_f = 1/FFD$ ) determine the local curvature of the  
287 valley ( $1/r_v'$ ) that reflects the contractile force ( $T/r_v'$ ) for wound closures. The mathematical  
288 relationship between these 4 variables can be expressed as follows (Fig. S6).

289 
$$r_v' = \frac{h^2 + 2h \cdot R_{initial} \cdot \cos\left(\frac{L}{2R_{initial}}\right) - 2h \cdot R_{initial} - 2R_{initial}^2 \cdot \cos\left(\frac{L}{2R_{initial}}\right) + 2R_{initial}^2}{2\left(h \cdot \cos\left(\frac{L}{2R_{initial}}\right) + R_{initial} \cdot \left(-\cos\left(\frac{L}{2R_{initial}}\right)\right) + R_{initial}} \quad (5)$$

290 By fitting the data of  $R_{initial}$  and  $FFD$  to Eq. 5, we obtain the values of coefficient terms,  $h$  (58.27  
291  $\mu\text{m}$ ) and  $r_v'$  (89.32  $\mu\text{m}$ ), which best estimate the measured values (Fig. S6). The  $h$  value is already  
292 confirmed as an independent value to the  $R_{initial}$  changes (Fig. S1), which ranges from 40 to 70 $\mu\text{m}$ ,  
293 supporting the validity of the optimized value. After fixing the  $h$  to the optimized value, we can  
294 plot the contour map of  $r_v'$  according to the  $L$  and  $R_{initial}$ , followed by laying over the experimental  
295 data on the contour map for comparison (Fig. 4(f)). The data points are well distributed on the

296 suggested decaying contour with optimized  $h$  and  $r_v'$  (marked in gray), which confirms that the  
297 regulation of finger extrusion by  $R_{initial}$  must cause the constant  $r_v'$  to be independent of  $R_{initial}$ . It is  
298 notable that the experimental data for  $r_v'$  values in the wounds of various  $\kappa_{initial}$ , indeed, exhibit  
299 nonsignificant differences for various initial radii and the value similar to the expected  $r_v'$  (marked  
300 in gray) (Fig. 4(g)). This result confirms the independent wound closure speeds shown in Eq. (2).  
301 These intriguing results imply that the retardance of fingering extrusions in the wounds of larger  
302  $\kappa_{initial}$  correlates with the conservation of  $r_v'$  and closure rate in circular wounds of varying sizes  
303 with varying curvatures.

304 Based on these results, the proposed wound closure steps in Fig. 1(h) can be explained as an  
305 orchestration of cell density-driven pressure, cell-cell repulsions, and initial boundary curvature.  
306 As shown in Fig. 4(h), the degree of roughness in the wound boundary is influenced by the initial  
307 cellular density and is further perturbed by cell division-induced fingering. The cellular density  
308 acts as an upstream cue for controlling fingering frequency, and those fingers link the density to  
309 the wound closure rate via shaping the curvature of valleys ( $1/r_v'$ ) Fig. 4(i). Contrary to expectations,  
310 the convergence of cells towards the center of the wound caused by negative initial curvature does  
311 not result in higher fingering frequency; rather, the frequency is inversely correlated with initial  
312 curvature ( $1/R_{initial}$ ). Consequently, this counterbalanced decrease in fingering frequency equalizes  
313 the wound closure rate by forming similar local curvatures along the valley independent to the  
314 initial curvatures.

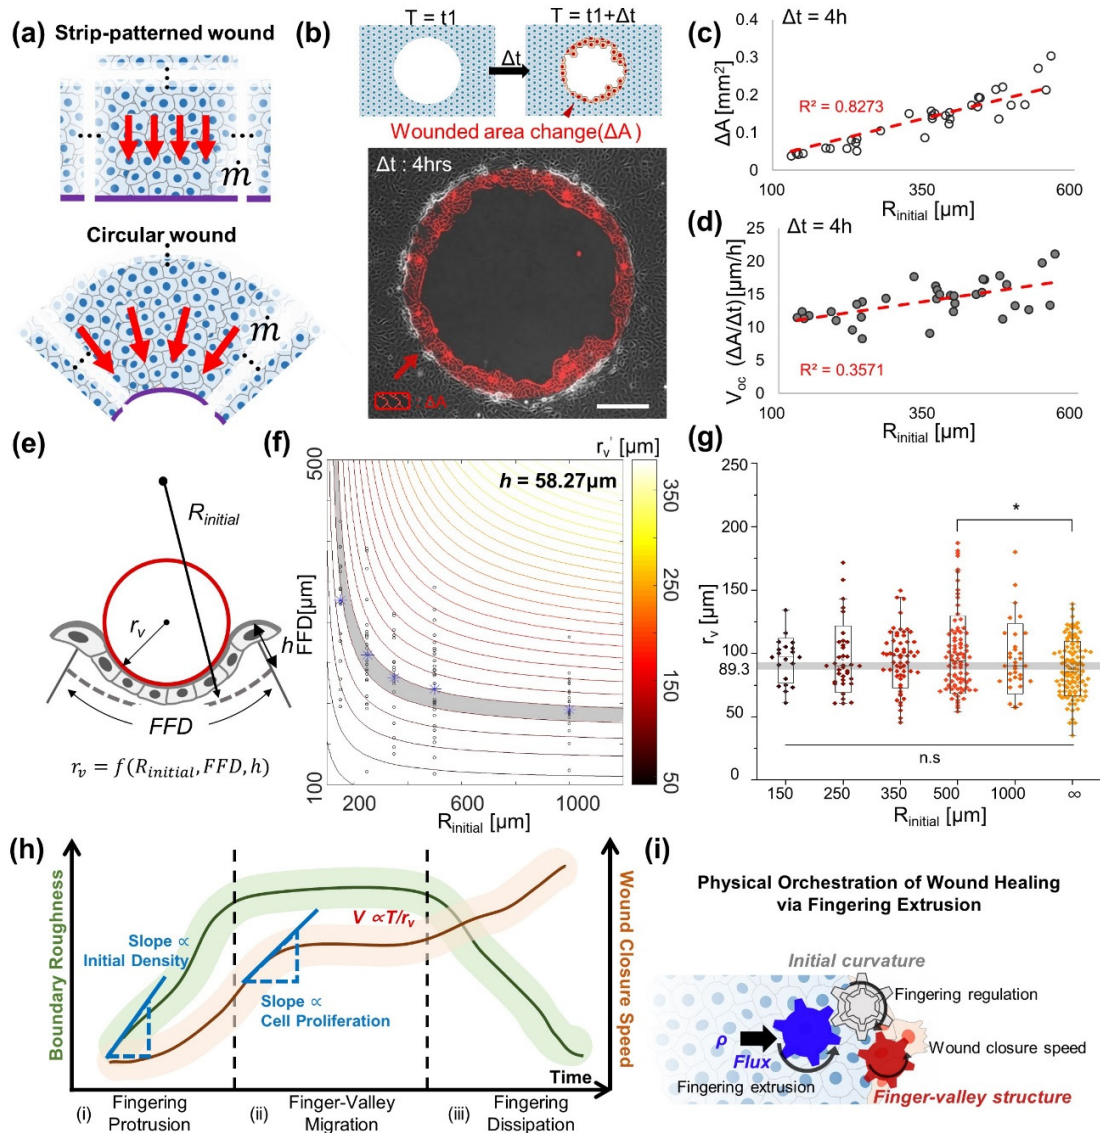

315

316 **Fig. 4 Changes in wound closure rates and fingering extrusions from the initial wound curvature**  
 317 **differences.** (a) Schematics for differences of the cell flux due to the initial curvature of boundary, (b)  
 318 Measurement of wounded area changes in the experiments, the area between two boundaries with 4 hrs  
 319 iteration is one data for wounded area changes. (c-d) Scatter plots for wounded area changes and mean  
 320 wound healing speed according to the geometrical properties of the boundary, (e) Relationship amongst  
 321 curvatures of valleys, FFD, initial curvature, and amplitudes of fingers(after fingers were formed), when  
 322 cell boundary is initially curved, (f) Simulation results for relationships amongst final curvatures, initial  
 323 diameters, and distance between finger, when  $h = 58.27 \mu\text{m}$ . And scatter plots of experiment results for  
 324 FFD according to the  $R_{initial}$  (Blue stars: average value for each  $R_{initial}$ ), (g) Results of the local radius of  
 325 curvature according to the initial boundary diameter. (\* :  $p \leq 0.05$ , \*\* :  $p \leq 0.01$ , \*\*\* :  $p \leq 0.001$ ,  
 326 determined by one-way ANOVA), (h) Schematic for the wound closing steps with regulating factors for  
 327 fingering extrusion and developing speed, (i) Summary of wound closing mechanisms through the  
 328 orchestrations of physical factors.

329

330 **Curvature-driven monolayer structure regulated the fingering extrusions.**

331 Finally, we investigate the mechanism for suppressing the fingering extrusions at the higher  $\kappa_{initial}$   
332 condition. At first, we check the changes in the density-related characteristics while varying the  
333  $\kappa_{initial}$ . The cellular density near the boundary, that are considered a dominant factor for inducing  
334 fluxes and initial fingers, exhibits no significant differences for the different values of  $\kappa_{initial}$  (Fig.  
335 S7(a, b)). Spatiotemporal changes of densities also do not exhibit any distinctive patterns amongst  
336 various initial radii (or  $\kappa_{initial}$ ) (Fig. S7(c-e)). When the alignment of traction force, the proposed  
337 factor for determining the fingering extrusion region (Fig. S4), is examined, the vector field of  
338 traction forces near the boundary is considerably aligned to the radial direction independent of the  
339 wound diameter at the initial time as shown in Fig. 5(a). When traction alignments at 0hr and 3 hrs  
340 are compared in the wounds of 3 different sizes, the vectors in only the smallest wound  
341 ( $R_{initial}=150\mu\text{m}$ ) show a noticeable loss in the alignment and random distribution of vectors at 3hr.  
342 For quantification of the radial alignment of traction force, the fraction of vectors between  $-30^\circ$   
343 and  $30^\circ$  to the radial axis is calculated (Fig. 5(b)). As shown in Fig. 5(c), the proportion of aligned  
344 traction vectors has a similar value at the initial time point, but after 3 hrs, the proportion of aligned  
345 vectors of the  $R_{initial}=150\mu\text{m}$  condition significantly decreases. From these results, we propose that  
346 the initial development of fingers must occur irrespective of the  $\kappa_{initial}$  but additional finger  
347 formation is retarded by disoriented traction vectors for small wounds of higher negative curvature.  
348 Timely maturation of the actomyosin structures whose function is to counterbalance the fingering  
349 extrusions<sup>14</sup>, could also contribute to the suppression of finger formations during the closure (Fig.  
350 5(d, e)). Interestingly, after 4 hrs, the radius of multicellular actomyosin curvatures ( $R_{actomyosin}$ ) are  
351 mostly distributed below  $200\mu\text{m}$ , which coincides with the critical  $R_{initial}$  where the fingering

352 frequency is dramatically decreased (Fig. 5(f)). Based on these data, we postulate that the  
353 suppressed finger formation at the higher negative curvature levels may be induced by the  
354 maturation of actomyosin cables. Alternatively, from the correspondence between the previously  
355 proposed  $r_v'$  (Fig. 4 (h)) and the  $R_{actomyosin}$ , the "self-control" of  $r_v'$  value may be the consequence  
356 of the curvatures of actomyosin rings that induce contraction force for cell migration.

357 The position of cells can also have the suppressing effect for finger development. In various  
358 cellular migration models, the intercellular distance has been considered as an important factor  
359 that contribute in determining the intercellular energy between neighboring cells. One type of  
360 energy from the cell-cell interactions is repulsive potential with Gaussian shapes ( $U(r) =$   
361  $\epsilon e^{\left(-\frac{r^2}{\sigma^2}\right)}$ ), that captures the mildly repulsive system like cells<sup>46</sup>. In the initially curved wound  
362 boundary, the boundary cells would increase this repulsive potential as they move forward due to  
363 the intrinsic curvature effect (Fig. 5(g)). As shown in Fig. 5(h), the mathematical model predicts a  
364 dramatic increase in the repulsive potential at the smaller  $R_{initial}$  condition. When the cell-cell  
365 distance is decreased to  $d_{c,0} = 20\mu\text{m}$ , which represents the extremely high density of cells, the  
366 effect of the increase in potential becomes insignificant when  $R_{initial} = 150\mu\text{m}$ . As the cells are  
367 known to generate the repulsion force by neighboring cells close enough<sup>34,35</sup>, the relative position  
368 of a cell with respect to the other neighbors can determine the direction of the total repulsion force,  
369 allowing us to predict the direction of cell protrusion (Fig. 5(i)). As shown in Fig. 5(j), the wounds  
370 of all three sizes show higher distributions of backward-directed repulsions force vectors that work  
371 against the extrusion of fingers.

372 To confirm the importance of the multicellular actomyosin ring and repulsion potentials in  
373 suppressing finger formation, we conducted an analysis while inhibiting myosin activity with

374 blebbistatin (25 $\mu$ M). As shown in Fig. 5(k), the average number of fingers was higher in the  
375 blebbistatin-treated condition, confirming the significant suppressive function of actomyosin rings  
376 in finger extrusion. However, both conditions showed a dramatic decrease in fingering frequency  
377 for smaller wounds with a closer cell-cell distance, indicating that repulsive potential based on cell  
378 position also plays a critical role in modifying finger extrusion. In these cytoskeletal-based  
379 analyses, we acknowledge that the physical forces due to negative curvature make it challenging  
380 for boundary cells to form fingers.



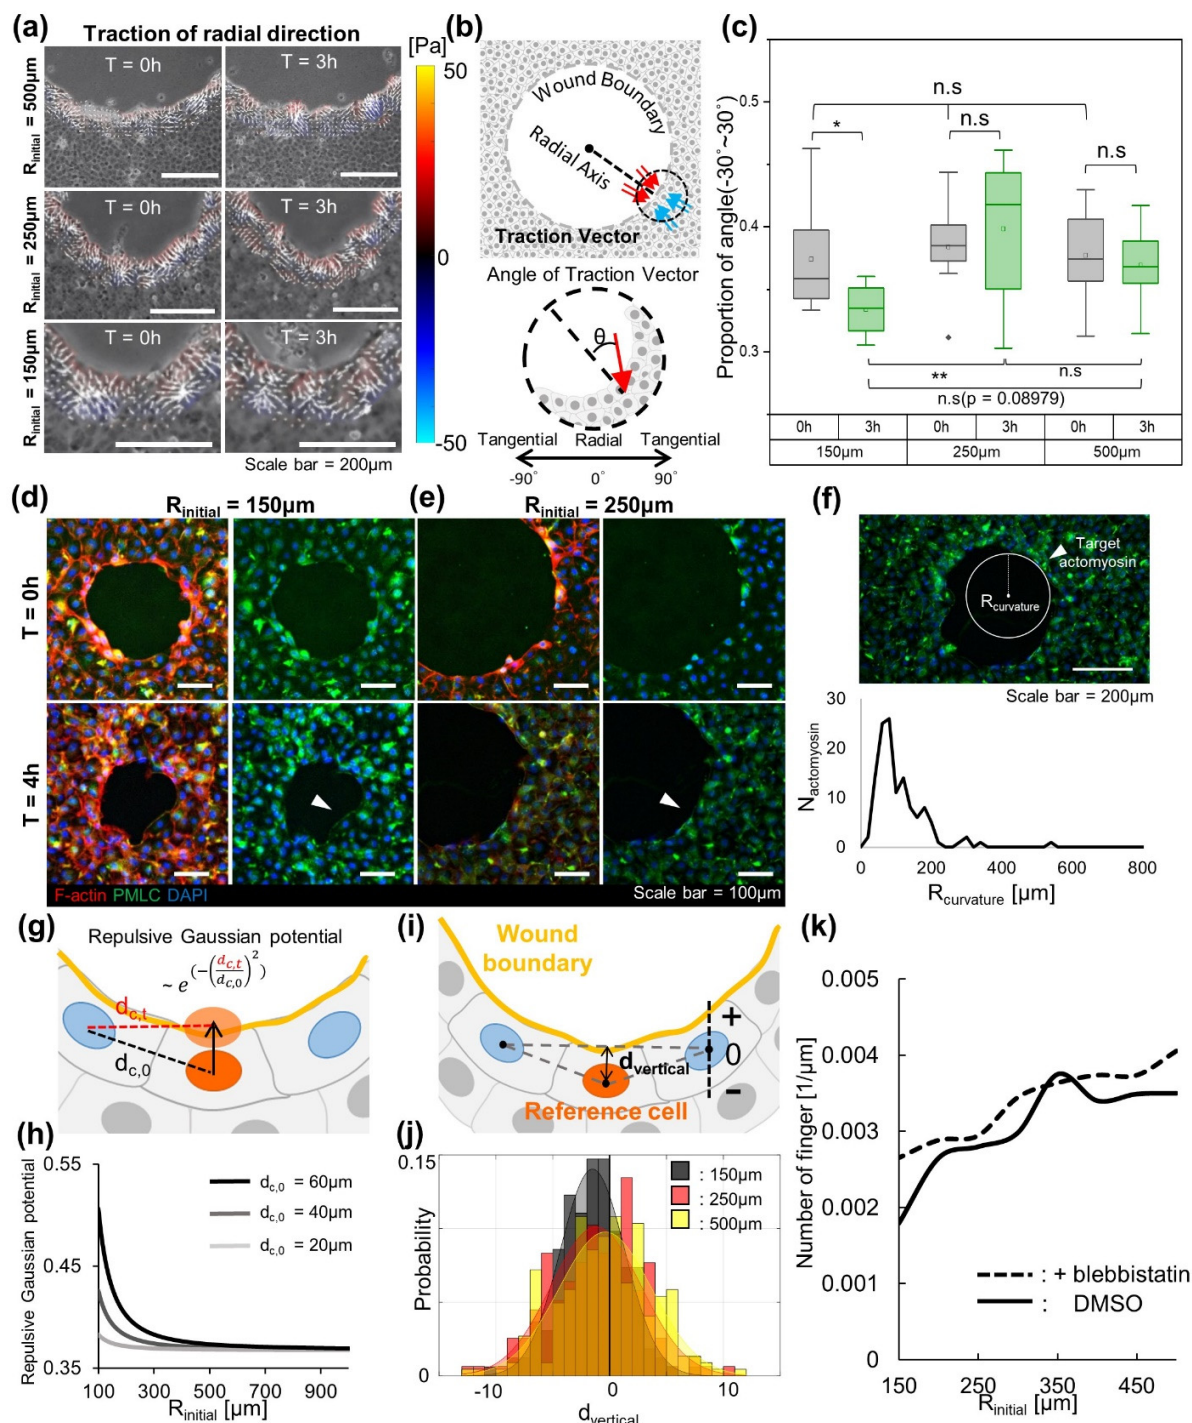

381

382 **Fig. 5 Mechanisms for retarding the fingering extrusions in the wounds with higher initial curvatures.** (a) Radial  
383 traction force distribution before fingers were formed in circular wounds with various diameters. (b) Definition of the  
384 traction angle with respect to the radial directions in the circular wounds. (c) Proportion of traction angles that aligned  
385 to the radial directions at 0 and 3 hrs later starting wound closures. (d, e) Immunofluorescence images for the



386 cytoskeletal structures at 0hr and 4hr after closure, which related to the formation of actomyosin rings where the  $R_{\text{initial}}$   
387 = 150, 250 $\mu\text{m}$ , (red = phalloidin, green = myosin II light chain, blue = DAPI), (f) Populations of multicellular  
388 actomyosin rings according to the neighboring radius of curvature( $R_{\text{curvature}}$ ), (g) Schematic for determining the  
389 repulsive gaussian potential at the wound boundary, (h) Simulation results about the repulsive gaussian potential in  
390 terms of initial radius of wounds in various cell densities. (i) Definition of reference cell and distance from the  
391 connecting line, the negative sign meant that reference cell is under pressure to behind by adjacent cells. (j) Histogram  
392 of the distance from the connecting line according to the wound diameter. (k) Changes in the number of fingers per  
393 unit length according to the initial radius when the blebbistatin (25 $\mu\text{m}$ ) was treated or not (DMSO: n = 3, samples :  
394 84, blebbistatin: n =2, samples : 52).

395

396

## 397 **Discussion**

398 In this study, we explored the spontaneous emergence of finger-valley structures that appear  
399 along the boundary during the closure of an epithelial monolayer. During the wound closure, the  
400 fingers are formed by leader cells that crawl faster than neighboring cells, and the cells in the  
401 concave valley regions between fingers accelerate to catch up by utilizing contractile forces to  
402 smoothen the roughness. If the speed disparities between the leaders in the fingers and neighboring  
403 cells were to be maintained, the finger amplitudes would continue to grow, resulting in increasing  
404 boundary roughness. The roughness index (RI) value rose quickly as fingers emerge, saturated at  
405 a constant level while fingers and valleys move at a similar level, and fell until fingers were  
406 suppressed and the wound was closed by the contraction of the actomyosin cable. We identified  
407 the driving factors for fingering extrusions as cellular density and the global curvature of the initial  
408 boundary, demonstrating how the finger-valley structure immediately affected wound closure rates  
409 via inter-controlled crawling and boundary contraction by external factors like initial curvatures  
410 and cellular density.

411 In order to investigate the impact of fingering characteristics on wound closure rates, we  
412 developed a simple mathematical model for the curvature along the fingers. Our findings revealed  
413 that the correlation between fingering frequency and wound closure rate was stronger than the  
414 relationship between cellular density and wound closure rate, which is typically the primary  
415 mechanism for collective cell migration. We also found that cellular density had a stronger  
416 correlation with fingering frequency, indicating that cellular density plays an upstream role in  
417 finger generation. We confirmed that the gradient of cellular density induced diverging cell fluxes,  
418 which were then transmitted to the extruding location of fingers via cell-cell adhesions. Cell

419 division also played a crucial role in increasing fingering frequency by forming divergence and  
420 reducing the velocity correlation length in the monolayer (Fig. S8). Based on previous work by  
421 Vishwakarma M. et al., which explains the occurrence of additional fingers when the mechanical  
422 stress correlation lengths are shorter, we hypothesized that the dividing rate or initial cell density  
423 would determine the physical correlation lengths for velocity or mechanical stress between cells  
424 that ultimately determine the occurrence of fingers<sup>33</sup>.

425 The initial concave curve at the wound boundary induced the converging cell flux from the  
426 monolayer, predicting more fingering extrusions as the curvature rose. However, fingering  
427 extrusion was suppressed at higher curvatures, which aligned with a mathematical relationship for  
428 uniform curvature values, regardless of the initial curvatures. Additionally, experiments revealed  
429 insignificant differences in local valley curvatures between samples with different initial global  
430 curvature values. These results demonstrate that the fingering frequency must be finely regulated  
431 to meet a certain valley curvature value irrespective of the global boundary shapes. In addition, the  
432 wound boundary maintained a similar closing speed regardless of the initial curvature of the wound,  
433 employing a "self-control" mechanism likely to maximize closure efficiency by regulating energy  
434 costs. By controlling the finger protrusion and valley contraction to maintain the overall roughness  
435 of the boundary at a moderate wound closure speed, undesired stretching of cells and rupture of  
436 fingers can also be prevented. Along the boundary, the multicellular actomyosin arc formed, acting  
437 as obstacles against protruding lamellipodia to counterbalance the crawling fingers. We have also  
438 observed a similarity in length scale between the characteristic radius of valley curvature and the  
439 radius of the actomyosin arc, suggesting the possible existence of a characteristic length of the  
440 actomyosin arc that induces contractile migrations.

441 Furthermore, our research has shown that the fingering extrusion is determined by the relative  
442 positions of the cells, which reflect the physical potential of each constituent cell. This  
443 phenomenon is similar to the change in melting temperature at solid-liquid interfaces, which is  
444 influenced by exterior curvatures as described by the Gibbs-Thomson equations<sup>36</sup>. We also have  
445 observed that the protrusion of fingers driven by cellular flux can be explained by adjusting the  
446 particle movements with a soft repulsion force. This provides further insight into the mechanisms  
447 behind fingering extrusion and highlights the importance of considering the physical properties  
448 and interactions of individual cells in these processes. Overall, our approach to the complex  
449 biological event is significant because it can be generalized to broader physical phenomenon.  
450 Therefore, the proposed mechanisms are anticipated to be utilized in various contexts to simplify  
451 the complex biophysical systems that feature rough boundaries with multiple protrusions.

452

453

## 454 **Material and methods**

### 455 **Cell Culture**

456 MDCK (Mardin Darby canine kidney) cell line, derived from normal epithelial cells of the dog  
457 kidney, was cultured in DMEM (Gibco, USA) media supplemented with 10% fetal bovine serum  
458 and 1% penicillin/streptomycin. In both culture and live imaging systems, cells were maintained  
459 in a humidified incubator with 5% CO<sub>2</sub> and 37°C.

### 460 **Fabrication and adaptation of silicone stencils for making wounds**

461 The PDMS (polydimethylsiloxane) silicone oil (Sylgard 184, Dow Corning) was utilized to  
462 make the stencils with various embossed shapes for wounds. The PDMS elastomer was cured in a  
463 10:1 ratio with a curing agent and poured into the SU-8 wafer fabricated by the photo-lithography  
464 methods (MicroFIT, Seongnam, Korea). After removing the residual gases inside of the PDMS  
465 through the Vacuum container, we cured the PDMS for at least 3 hrs in the oven (>65°C). The  
466 cured PDMS stencil was gently detached from the wafer and cut into the block that contains a  
467 similar shape of embossed structures with various sizes. Each block was treated with the oxygen  
468 plasma to make a hydrophilic surface for preventing the bubble generation from loads of cell  
469 suspensions. The PDMS blocks were attached to glass-bottom dishes, and the cell suspension was  
470 gently put between the blocks and glasses. Then, we incubated cells until they form the monolayer  
471 except for the embossed structures.

### 472 **Live cell imaging**

473 Phase-contrast images for observing the cell movements and fluorescent images for  
474 displacements of the substrate were taken every 10~15 minutes using a 5X objective lens. All

475 experiments on the live-cell imaging were conducted on the Axiovert 200M (Carl Zeiss)  
476 microscope with an incubating system (37°C and 5% CO<sub>2</sub>).

#### 477 **Quantification of curvature along the wound boundary**

478 Local curvatures of valley regions were measured from a circle passing three points: the center  
479 and both ends of valleys. The curvature value was a reciprocal number of the circle radius, and the  
480 center of the circle determined the sign of curvature. If the center point is located at the exterior of  
481 the cell layer (wounded region), the curvature sign would be negative.

#### 482 **Visualization of cell motilities via the DPIV method**

483 The quantification of cell migration was conducted by visualizing cellular motilities. For the  
484 visualization of cells, we adjusted the DPIV (digital particle image velocimetry) method to the  
485 sequence of phase images. The commercial software, Image Velocimetry Tool for MATLAB,  
486 calculated the cross-correlation between cell images<sup>37</sup>. The double-pass PIV by the Fast Fourier  
487 Transform (FFT) window deformation algorithm was used for the calculation. We determined the  
488 first window size for 32·32 pixels (64·64μm<sup>2</sup>) and the second window size of 16·16 pixels  
489 (32·32μm<sup>2</sup>) with an 8 pixels (16 μm) interval that is similar to the length of single cells. In this  
490 way, the velocity vector fields of the cell monolayer were gained. Other motility factors, like  
491 divergence and correlation length, could be calculated from the vector data.

#### 492 **Proliferation controls of cell**

493 To control the proliferation of cells, we adapted the thymidine, DNA synthesis inhibitor,  
494 treatment. Six hrs before starting the wound closure experiment, thymidine was added to the cell  
495 group to a final concentration of 2mM for waiting; the cells were arrested at the G1/S boundary.

## 496 **Immunostaining of cell cytoskeletons**

497 For the immunofluorescence staining, 4% paraformaldehyde was used to fix the cell layer for 20  
498 min at room temperature, then the cells were rinsed with PBS at least three times. The fixed cell  
499 layer was permeabilized with 0.5% Triton X-100 in PBS for 15min with an ice pack and washed  
500 three times with PBS. To block the unspecific binding, we incubated the cell layer in the 3% BSA  
501 in PBS in the incubator for 30mins. After blocking, the cells were incubated in the primary  
502 antibody in 3% BSA with a 1:100 ratio at 4°C overnight. Next, the samples were rinsed three times  
503 with 3% BSA and additionally incubated with a secondary antibody (Alexa Fluor 488 goat anti-  
504 rabbit antibody (A11008, Thermo Fisher Scientific)) in 3% BSA with a 1:200 ratio at room  
505 temperature for 2 hrs. For staining the actin cytoskeletons and nucleus, Rhodamine-phalloidin  
506 (R415, Thermo Fisher Scientific) in 3% BSA with a 1:50 ratio and 4',6-diamidino-2-phenylindole  
507 (DAPI, Thermo Fisher Scientific) were employed, respectively.

## 508 **Hydrogel-based traction force visualization substratum**

509 Mapping forces of cells require the soft gel that can be deformed by the cellular traction force.  
510 The deformable soft gel was made from the polyacrylamide (PA) gel, which could regulate its  
511 stiffness by changing the composition. For capturing the deformation of gels, the fluorescent beads  
512 layer between cells and PA gel was adopted. The mixture of PA gel and fluorescent beads  
513 (diameter = 0.5um) was polymerized on the glass bottom dish and simultaneously centrifuged to  
514 pull the beads to the top surface of the gel. Next, the polymerized PA gel was treated with  
515 sulfosuccinimidyl-6-(4-azido-2-nitrophenylamino) hexanoate (Sulfo-SANPAH; Proteochem) 1  
516 mg/ml in 50 mM HEPES buffer (Life Technologies) and added 50 µg/ml collagen type I (PureCol;  
517 Advanced BioMatrix) for being an adaptable gel for cell living.



## 518 **Traction force microscopy via Fourier transformation**

519 The map for the traction force fields of the cell monolayer was measured from the deformation  
520 of PA-gels, which is visualized by the displacement of the fluorescent beads layer. We used the  
521 unconstrained Fourier transform traction microscopy by utilizing the previously published  
522 algorithms<sup>38-40</sup> adapted in MATLAB software.

## 523 **Statistical Analysis**

524 Statistical data were analyzed using Origin and Excel software. The box plotting of data was  
525 conducted by using the Origin software, and the Excels and MATLAB software handled other  
526 plots. For the statistical results, the data were compared using the Mann-Whitney test and One-  
527 Way ANOVA in Origin software. Statistical significance is marked as \*  $P < 0.05$ , \*\*  $P < 0.01$ , \*\*\*  
528  $P < 0.001$ .

## 529 **Acknowledgments**

530 J.J. Fredberg's lab generously provided TFM and MSM codes at Harvard T.H. Chan School of Public  
531 Health. This research was supported by National Research Funding granted by the Korean Government  
532 (NRF-2017R1A2B2007673, NRF-2020M3A9E4039658) and by the KAIST (Basic Science Research  
533 Program for faculty members).

534

## 535 **AUTHOR INFORMATION**

### 536 **Corresponding Authors**

537 \*E-mail: [j\\_shin@kaist.ac.kr](mailto:j_shin@kaist.ac.kr), [ryush@kaist.ac.kr](mailto:ryush@kaist.ac.kr)

### 538 **Notes**

539 The authors declare no competing financial interest.

540

## 541 References

- 542 1 Jacinto, A., Martinez-Arias, A. & Martin, P. Mechanisms of epithelial fusion and repair. *Nature*  
543 *cell biology* **3**, E117-123, doi:10.1038/35074643 (2001).
- 544 2 Jacinto, A., Woolner, S. & Martin, P. Dynamic analysis of dorsal closure in *Drosophila*: from  
545 genetics to cell biology. *Dev Cell* **3**, 9-19, doi:10.1016/s1534-5807(02)00208-3 (2002).
- 546 3 Marinari, E. *et al.* Live-cell delamination counterbalances epithelial growth to limit tissue  
547 overcrowding. *Nature* **484**, 542-545, doi:10.1038/nature10984 (2012).
- 548 4 Rosenblatt, J., Raff, M. C. & Cramer, L. P. An epithelial cell destined for apoptosis signals its  
549 neighbors to extrude it by an actin- and myosin-dependent mechanism. *Current biology : CB* **11**,  
550 1847-1857, doi:10.1016/s0960-9822(01)00587-5 (2001).
- 551 5 Gonzalez, A. C., Costa, T. F., Andrade, Z. A. & Medrado, A. R. Wound healing - A literature  
552 review. *Anais brasileiros de dermatologia* **91**, 614-620, doi:10.1590/abd1806-4841.20164741  
553 (2016).
- 554 6 Pastar, I. *et al.* Epithelialization in Wound Healing: A Comprehensive Review. *Adv Wound Care*  
555 *(New Rochelle)* **3**, 445-464, doi:10.1089/wound.2013.0473 (2014).
- 556 7 Krishnaswamy, V. R. & Korrapati, P. S. Role of Dermatopontin in re-epithelialization:  
557 Implications on keratinocyte migration and proliferation. *Scientific Reports* **4**, 7385,  
558 doi:10.1038/srep07385 (2014).
- 559 8 Kim, J. H. *et al.* Propulsion and navigation within the advancing monolayer sheet. *Nature*  
560 *materials* **12**, 856-863, doi:10.1038/nmat3689 (2013).
- 561 9 Bement, W. M., Mandato, C. A. & Kirsch, M. N. Wound-induced assembly and closure of an  
562 actomyosin purse string in *Xenopus* oocytes. *Current biology : CB* **9**, 579-587,  
563 doi:10.1016/s0960-9822(99)80261-9 (1999).
- 564 10 Abreu-Blanco, M. T., Verboon, J. M., Liu, R., Watts, J. J. & Parkhurst, S. M. *Drosophila*  
565 embryos close epithelial wounds using a combination of cellular protrusions and an actomyosin  
566 purse string. *J Cell Sci* **125**, 5984-5997, doi:10.1242/jcs.109066 (2012).
- 567 11 Anon, E. *et al.* Cell crawling mediates collective cell migration to close undamaged epithelial  
568 gaps. *Proceedings of the National Academy of Sciences* **109**, 10891-10896,  
569 doi:10.1073/pnas.1117814109 (2012).
- 570 12 Klarlund, J. K. Dual modes of motility at the leading edge of migrating epithelial cell sheets. *Proc*  
571 *Natl Acad Sci U S A* **109**, 15799-15804, doi:10.1073/pnas.1210992109 (2012).
- 572 13 Vedula, S. R. K. *et al.* Mechanics of epithelial closure over non-adherent environments. *Nature*  
573 *Communications* **6**, 6111, doi:10.1038/ncomms7111 (2015).
- 574 14 Reffay, M. *et al.* Interplay of RhoA and mechanical forces in collective cell migration driven by  
575 leader cells. *Nature cell biology* **16**, 217-223, doi:10.1038/ncb2917 (2014).
- 576 15 Florian, P., Schöneberg, T., Schulzke, J. D., Fromm, M. & Gitter, A. H. Single-cell epithelial  
577 defects close rapidly by an actinomyosin purse string mechanism with functional tight junctions.  
578 *The Journal of physiology* **545**, 485-499, doi:10.1113/jphysiol.2002.031161 (2002).
- 579 16 Martin, P. & Lewis, J. Actin cables and epidermal movement in embryonic wound healing.  
580 *Nature* **360**, 179-183, doi:10.1038/360179a0 (1992).
- 581 17 Danjo, Y. & Gipson, I. K. Actin 'purse string' filaments are anchored by E-cadherin-mediated  
582 adherens junctions at the leading edge of the epithelial wound, providing coordinated cell  
583 movement. *J Cell Sci* **111 ( Pt 22)**, 3323-3332, doi:10.1242/jcs.111.22.3323 (1998).
- 584 18 Tamada, M., Perez, T. D., Nelson, W. J. & Sheetz, M. P. Two distinct modes of myosin assembly  
585 and dynamics during epithelial wound closure. *Journal of Cell Biology* **176**, 27-33,  
586 doi:10.1083/jcb.200609116 (2007).

- 587 19 Bement, W. M., Forscher, P. & Mooseker, M. S. A novel cytoskeletal structure involved in purse  
588 string wound closure and cell polarity maintenance. *The Journal of cell biology* **121**, 565-578,  
589 doi:10.1083/jcb.121.3.565 (1993).
- 590 20 Nobes, C. D. & Hall, A. Rho, rac, and cdc42 GTPases regulate the assembly of multimolecular  
591 focal complexes associated with actin stress fibers, lamellipodia, and filopodia. *Cell* **81**, 53-62,  
592 doi:10.1016/0092-8674(95)90370-4 (1995).
- 593 21 Cochet-Escartin, O., Ranft, J., Silberzan, P. & Marcq, P. Border forces and friction control  
594 epithelial closure dynamics. *Biophysical journal* **106**, 65-73, doi:10.1016/j.bpj.2013.11.015  
595 (2014).
- 596 22 Ravasio, A. *et al.* Gap geometry dictates epithelial closure efficiency. *Nature Communications* **6**,  
597 7683, doi:10.1038/ncomms8683 (2015).
- 598 23 Staddon, M. F. *et al.* Cooperation of dual modes of cell motility promotes epithelial stress  
599 relaxation to accelerate wound healing. *PLOS Computational Biology* **14**, e1006502,  
600 doi:10.1371/journal.pcbi.1006502 (2018).
- 601 24 Ajeti, V. *et al.* Wound healing coordinates actin architectures to regulate mechanical work.  
602 *Nature Physics* **15**, 696-705, doi:10.1038/s41567-019-0485-9 (2019).
- 603 25 Nikolić, D. L., Boettiger, A. N., Bar-Sagi, D., Carbeck, J. D. & Shvartsman, S. Y. Role of  
604 boundary conditions in an experimental model of epithelial wound healing. *American Journal of*  
605 *Physiology-Cell Physiology* **291**, C68-C75, doi:10.1152/ajpcell.00411.2005 (2006).
- 606 26 Fenteany, G., Janmey, P. A. & Stossel, T. P. Signaling pathways and cell mechanics involved in  
607 wound closure by epithelial cell sheets. *Current biology : CB* **10**, 831-838, doi:10.1016/s0960-  
608 9822(00)00579-0 (2000).
- 609 27 Matsubayashi, Y., Ebisuya, M., Honjoh, S. & Nishida, E. ERK activation propagates in epithelial  
610 cell sheets and regulates their migration during wound healing. *Current biology : CB* **14**, 731-  
611 735, doi:10.1016/j.cub.2004.03.060 (2004).
- 612 28 Alert, R., Blanch-Mercader, C. & Casademunt, J. Active Fingering Instability in Tissue  
613 Spreading. *Physical Review Letters* **122**, 088104, doi:10.1103/PhysRevLett.122.088104 (2019).
- 614 29 Poujade, M. *et al.* Collective migration of an epithelial monolayer in response to a model wound.  
615 *Proceedings of the National Academy of Sciences* **104**, 15988-15993,  
616 doi:10.1073/pnas.0705062104 (2007).
- 617 30 Vedula, S. R. *et al.* Epithelial bridges maintain tissue integrity during collective cell migration.  
618 *Nature materials* **13**, 87-96, doi:10.1038/nmat3814 (2014).
- 619 31 Ben Amar, M. & Wu, M. Re-epithelialization: advancing epithelium frontier during wound  
620 healing. *Journal of The Royal Society Interface* **11**, 20131038, doi:doi:10.1098/rsif.2013.1038  
621 (2014).
- 622 32 Büscher, T., Diez, A. L., Gompper, G. & Elgeti, J. Instability and fingering of interfaces in  
623 growing tissue. *New Journal of Physics* **22**, 083005, doi:10.1088/1367-2630/ab9e88 (2020).
- 624 33 Vishwakarma, M. *et al.* Mechanical interactions among followers determine the emergence of  
625 leaders in migrating epithelial cell collectives. *Nature Communications* **9**, 3469,  
626 doi:10.1038/s41467-018-05927-6 (2018).
- 627 34 Zimmermann, J., Camley Brian, A., Rappel, W.-J. & Levine, H. Contact inhibition of locomotion  
628 determines cell–cell and cell–substrate forces in tissues. *Proceedings of the National Academy of*  
629 *Sciences* **113**, 2660-2665, doi:10.1073/pnas.1522330113 (2016).
- 630 35 Prestipino, S., Saija, F. & Giaquinta, P. V. Phase diagram of softly repulsive systems: The  
631 Gaussian and inverse-power-law potentials. *The Journal of Chemical Physics* **123**, 144110,  
632 doi:10.1063/1.2064639 (2005).
- 633 36 Johnson, C. A. Generalization of the Gibbs-Thomson equation. *Surface Science* **3**, 429-444,  
634 doi:[https://doi.org/10.1016/0039-6028\(65\)90024-5](https://doi.org/10.1016/0039-6028(65)90024-5) (1965).

- 635 37 Thielicke, W. & Stamhuis, E. J. PIVlab – Towards User-friendly, Affordable and Accurate  
636 Digital Particle Image Velocimetry in MATLAB. *Journal of Open Research Software*,  
637 doi:10.5334/jors.bl (2014).
- 638 38 Butler, J. P., Tolić-Nørrelykke, I. M., Fabry, B. & Fredberg, J. J. Traction fields, moments, and  
639 strain energy that cells exert on their surroundings. *American journal of physiology. Cell*  
640 *physiology* **282**, C595-605, doi:10.1152/ajpcell.00270.2001 (2002).
- 641 39 Trepap, X. *et al.* Physical forces during collective cell migration. *Nature Physics* **5**, 426-430,  
642 doi:10.1038/nphys1269 (2009).
- 643 40 Lucia, S. E., Jeong, H. & Shin, J. H. Cell segregation via differential collision modes between  
644 heterotypic cell populations. *Molecular Biology of the Cell* **33**, ar129, doi:10.1091/mbc.E22-03-  
645 0097 (2022).

646

647
